# Supplementary material
Source: Research Square preprint supplement (doi:10.21203/rs.3.rs-9475615/v1)
Supplement: Supplementary file 2 [file 671308db7727078a7984b8fc.docx]

| No | Topic a | Vague | Clear | Detailed |
| --- | --- | --- | --- | --- |
| 1. | HSD sources | “We will need to use information from your medical records (you and your baby’s/babies’) for this study.” | “If you consent to it, the researchers involved in [trial name] may, in the future, access electronic data from your central NHS records, for example through NHS Digital until the study ends in 5 years.” | “At 52 weeks information will be gathered directly from your NHS digital medical records.” |
| 2. | Access to data | “People who don't need to know who you are won't be able to see your name or contact details. Your data will have a code number instead.” | “Only researchers involved in this study and regulatory authorities will have access to the data.” | “[Data controller] will collect your name, (NHS number, contact details, gender and  date of birth) to send you follow up questionnaires, contact you by telephone, access your health  records, make sure that relevant information about the trial is recorded for your care, and to  oversee the quality of the trial. Individuals from the Sponsors and regulatory organisations may  look at your medical and research records to check the accuracy of this trial. [Data controller] will pass these details to the Sponsors along with the information collected from and/or  your medical records. The only people in the Sponsor organisations who will have access to  information that identifies you will be people who need to contact you in relation to this trial and to  audit the data collection process.” |
| 3. | Data linkage | "A member of the central research team at Royal Papworth Hospital may need to contact your GP or other hospitals or healthcare providers you have seen, to gain information about any hospital stays you may have had after your surgery or information regarding your medication." | “Other personal information about you (such as your name, date of birth, postcode and NHS number) will be shared between the hospital, [data controller] and the NHS national databases (held by NHS Digital and NHS Wales Informatics Service) so that your well-being (survival and hospital admissions) can be monitored as part of the study” | “In order to collect information about your longer-term complications, the study team will send identifying patient information (name, NHS number, gender, date of birth and postcode) to NHS Digital. This will allow NHS digital to link your identifying details to the hospital episode data and send back data relating your shoulder.” |
| 4. | Trial withdrawal |  | “If you decide to take part you are still free to withdraw at any time and without giving a reason. Deciding not to take part or withdrawing from the study will not affect the healthcare that you receive, or your legal rights.” | “You can stop being part of the trial at any time, without giving a reason, but we will keep information about you that we already have, as it may affect our results.  If you choose to stop taking part in the trial, we would like to continue collecting information about your health from your hospital and NHS Digital. If you do not want this to happen, tell us and we will stop.  We need to manage your records in specific ways for the research to be reliable. This means that we won’t be able to let you see or change the data we hold about you.” |
| 5. | Data storage | “Your personal and medical information will be kept in a secured file and be treated in the strictest confidence.” | “All data is kept under a secure password protected database, owned by an authorised contractor” | “The University has an Information Security Management System based on ISO27001with a range of controls covering the protection of personal information. Annual security awareness training is mandatory for staff and the University is accredited under the NHS Information Governance Toolkit, the Payment Card Industry Data Security Standard and is in the process of gaining Cyber Essentials Plus for defined services. In relation to this study, any paper records will be kept in a locked filing cabinet, in a locked room in a building with controlled access. Any electronic data will be stored securely on our [data controller] servers that are password protected and access is user defined.” |
| 6. | Confidentiality | “All information about you will be handled in confidence. All information provided throughout this research is protected under the General Data Protection Regulation and the UK Data Protection Act (2018).” | "The data from this study will be anonymised and coded. These electronic data will be stored on university servers and university-approved online storage systems/databases, which are all encrypted and password protected. Paper data will be stored in locked cupboards at the Section of Eating Disorders at the Institute of Psychiatry, Psychology & Neuroscience. Only researchers involved in this study and regulatory authorities will have access to the data." | “All information collected by the Sponsor, including a copy of your signed consent form, will be securely stored at the Trial Office at the [sponsor] on paper and electronically and will only be accessible by authorised personnel. The only people in the [sponsor] who will have access to information that identifies you will be people who manage the study or audit the data collection process.” |
| 7. | Additional data recipients |  | “For the purposes of the research project, we will need to share your personal data with the app provider, as data will be collected within their app and stored on their servers until securely being transferred” | “In order to plan the surgery using specialist planning software, the  images will be sent outside of the European Union (EU) to the company that supplies the robot [company name]. These images will  contain at least two identifiers (for example, your name, hospital  number or date of birth), but these will only be seen by employees of  [company name] to plan your operation and will not be shared with any other  party.” |

Table 2 - Examples of information in PILs

a All topics are derived from HRA data protection disclosure requirements.
